# Supplementary material for: Evidence for Enhanced Efficacy of Passive Immunotherapy against Beta-Amyloid in CD33-Negative 5xFAD Mice
Source: MDPI journal article supplement (doi:10.3390/biom12030399), 2022-03-04
Supplement: s1 [file s1]

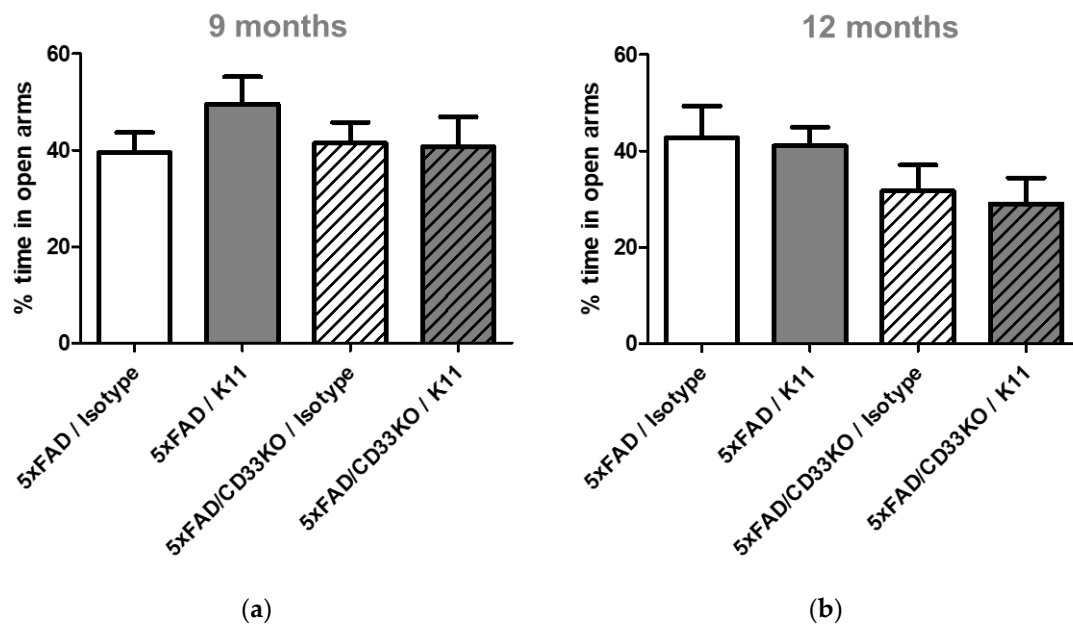

**Figure S2 - Elevated Plus Maze (EPM) test of 5xFAD and 5xFAD/CD33KO mice treated weekly with 4 mg/kg K11\_IgG2a or isotype control.** This test was performed 2 times with each animal, at the age of (a) 9 months and (b) 12 months. Test animals were placed with their head to the end of a defined closed arm of an elevated, plus-shaped (+) maze with two open and two enclosed arms. During the next 10 minutes, every movement of test animals was recorded by a video tracking system. The time the animals spent in the open arms was summed up in order to calculate % in exposed area. Sample size was at least 8 animals per group.
