# Supplementary material for: Evidence for Enhanced Efficacy of Passive Immunotherapy against Beta-Amyloid in CD33-Negative 5xFAD Mice
Source: MDPI journal article supplement (doi:10.3390/biom12030399), 2022-03-04
Supplement: s1 [file s1]

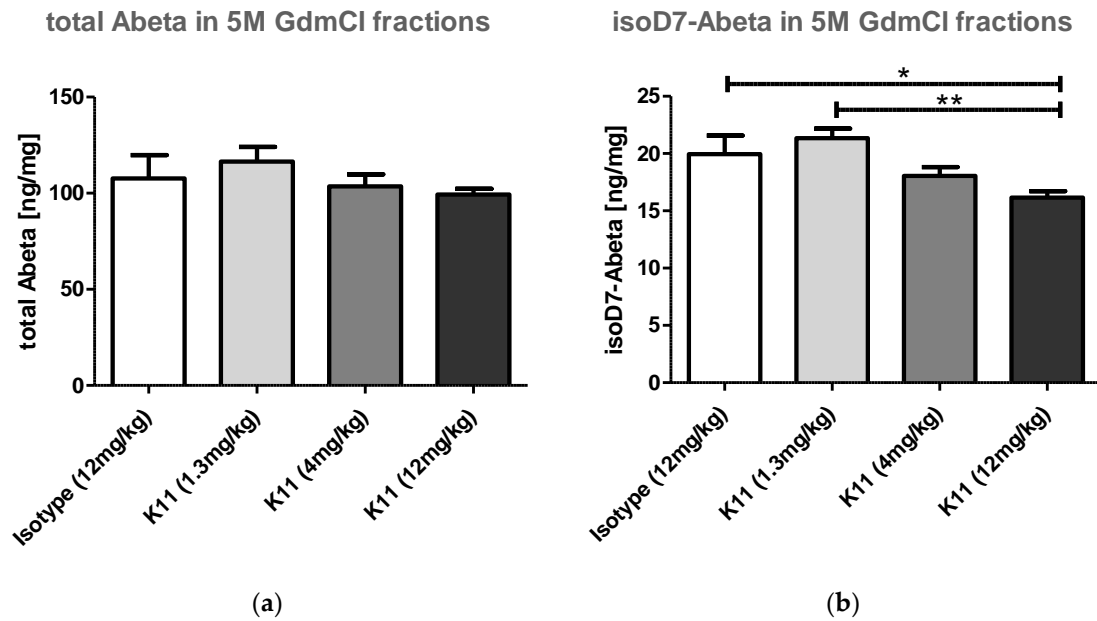

**Figure S1 - Quantification of total A $\beta$  and isoD7-A $\beta$  peptides in insoluble 5 M Guanidine hydrochloride (GdmCl) brain fractions of 5xFAD mice treated with different doses of K11\_IgG2a.** Three-month-old 5xFAD mice were treated intraperitoneally once a week with 12, 4 or 1.3 mg/kg K11\_IgG2a or 12 mg/kg isotype control, respectively. After 24 weeks of treatment, mice were sacrificed. The left hemisphere was homogenized in T-Per buffer, followed by centrifugation. The pellet was resuspended in 5 M GdmCl, again centrifuged and the supernatants applied to a total A $\beta$  **(a)** and isoD7-A $\beta$  **(b)** specific ELISA. Sample size was at least 8 animals per group. \* means  $P \leq 0.05$ ; \*\* means  $P \leq 0.01$ . The error bars represent SEM.
